# Supplementary material for: Influence of learning on range expansion and adaptation to novel habitats
Source: PubMed Central journal article supplement (PMC2779469; doi:10.1111/j.1420-9101.2009.01836.x), 2009-11
Supplement: jeb0022-2201-SD1.pdf [file jeb0022-2201-SD1.pdf]

# Influence of learning on range expansion and adaptation to novel habitats

Michael Sutter<sup>1,3</sup> and Tadeusz J. Kawecki<sup>2,4</sup>

## Supporting Information

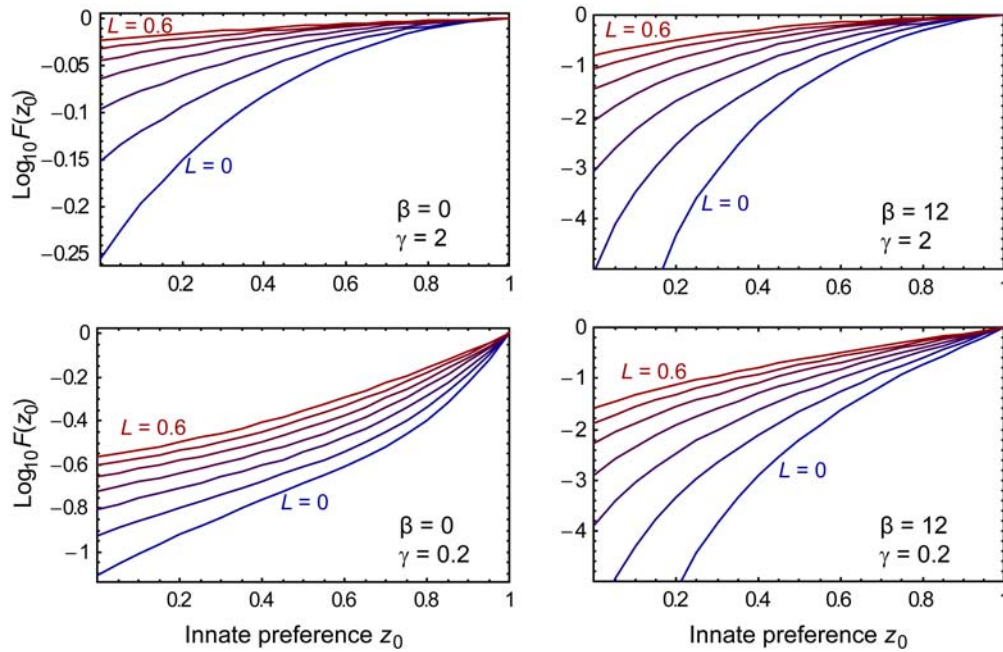

**Figure S1.** The effect of learning on the relationship between the innate preference for resource A and the log fitness in the novel habitat. The learning parameter  $L$  ranges from zero (i.e., no learning, blue lines) to  $L = 0.6$  (red lines) in increments of 0.1. The combinations of selection parameters  $\beta$  and  $\gamma$  used in the four panels correspond to the four corners of the parameters space in each panel of figures 2, 4 and 5.

## Description of animations

The dynamics of adaptation to a novel habitat: examples. Each individual is represented as a red asterisk, which indicates its genetic (innate) preference for resource A ( $z_0$ ), and as a black dot, indicating its preference for resource A after 10 runs of foraging ( $z_{10}$ ). The blue and green lines indicate the local quality of resource A and B, respectively.

**Animation 1:** simulation run from figure 3B. After being confined to the core habitat for a long time the population expands and simultaneously adapts to the novel habitat;  $m = 0.01$ ,  $L = 0.3$ ,  $\beta = 8.5$ ,  $\gamma = 0.5$ ; every 10th generation shown.

**Animation 2:** simulation run from figure 3C,D. A weak trade-off in fitness between the habitats allows the population to expand quickly into the new habitat; local adaptation evolves only slowly following the expansion;  $m = 0.01$ ,  $L = 0.6$ ,  $\beta = 2$ ,  $\gamma = 1.75$ ; every 100th generation shown
